# Supplementary material for: The effect of isorhamnetin glycosides extracted from Opuntia ficus-indica in a mouse model of diet induced obesity
Source: Royal Society of Chemistry journal article supplement (doi:10.1039/c4fo01092b), 2014-12-16
Supplement: c4fo01092b1.pdf [file c4fo01092b1.pdf]

## Supplementary information

### The effect of isorhamnetin glycosides extracted from *Opuntia ficus-indica* in a mouse model of diet induced obesity

César Rodríguez-Rodríguez, Nimbe Torres, Janet A. Gutiérrez-Urbe, Lilia G. Noriega, Iván Torre-Villalvazo, Ana M. Leal-Díaz, Marilena Antunes-Ricardo, Claudia Márquez-Mota, Guillermo Ordaz, Rocío A. Chavez-Santoscoy, Sergio O. Serna-Saldivar and Armando R. Tovar\*

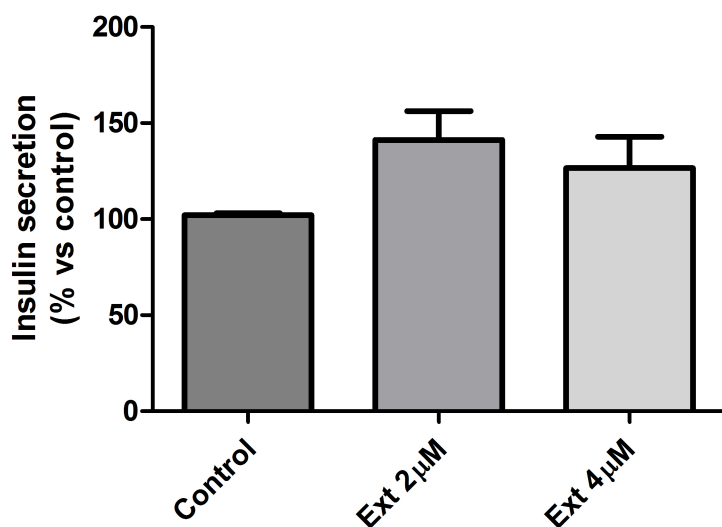

Supplementary figure 1 (Fig. S1). Insulin secretion in rat pancreatic islets at 11mM glucose instead of 5.5mM. Ext: *Opuntia ficus-indica* extract. Data are expressed as means  $\pm$  SE. No statistically difference was observed at  $P < 0.05$ .
